# Supplementary material
Source: PubMed Central journal article supplement (PMC9941684)
Supplement: JMI_010_S22402_SD001.pdf [file JMI_010_S22402_SD001.pdf]

**SUPPLEMENTARY MATERIAL**

**Phosphotungstic acid-enhanced microCT for  
quantitative visualization of mouse mammary gland  
morphology**

Anthi Kolokotroni<sup>1,2</sup>, Evi Gkikopoulou<sup>1,2</sup>, Vagelis Rinotas<sup>2</sup> and Eleni Douni<sup>1,2\*</sup>

<sup>1</sup>Laboratory of Genetics, Department of Biotechnology, Agricultural University of Athens, Iera Odos 75, 11855, Athens, Greece

<sup>2</sup>Institute for Bioinnovation, Biomedical Sciences Research Center "Alexander Fleming", Fleming 34, 16672, Vari, Greece

\*Corresponding author: Eleni Douni, Laboratory of Genetics, Department of Biotechnology, Agricultural University of Athens, Iera Odos 75, 11855 Athens, Greece, [douni@aua.gr](mailto:douni@aua.gr)/ Institute for Bioinnovation, Biomedical Sciences Research Center "Alexander Fleming", Fleming 34, 16672, Vari, Greece, [douni@fleming.gr](mailto:douni@fleming.gr)

**Supplementary Table 1.** Selected trabecular bone parameters from ASBMR nomenclature which were implemented to equivalently correspond to mammary gland parameters.

| <b>Unit</b>      | <b>Bone parameters<br/>(ASBMR nomenclature)</b> | <b>Mammary gland parameters (revised<br/>nomenclature)</b> |
|------------------|-------------------------------------------------|------------------------------------------------------------|
| mm <sup>3</sup>  | Tissue volume (TV)                              | Tissue volume (TV)                                         |
| mm <sup>3</sup>  | Bone volume (BV)                                | Ductal Volume (DV)                                         |
| %                | Percent bone volume (BV/TV%)                    | Percent ductal volume (DV/TV%)                             |
| mm               | Trabecular thickness (Tb.Th)                    | Ductal thickness (D.Th)                                    |
| mm <sup>-1</sup> | Trabecular number (Tb.N)                        | Ductal number (D.N)                                        |
| mm               | Trabecular separation (Tb.Sp)                   | Ductal separation (D.Sp)                                   |
| mm <sup>2</sup>  | Bone surface (BS)                               | Ductal surface (DS)                                        |
| mm <sup>-1</sup> | Bone surface density (BS/TV)                    | Ductal surface density (DS/TV)                             |
| –                | Fractal dimension (FD)                          | Fractal dimension (FD)                                     |

**Supplementary Table 2.** Volumetric and morphometric parameters measured by PTA enhanced microCT in abdominal mammary glands from 4 distinct developmental stages (n=7 mice/group). Data are shown as mean values  $\pm$  SEM.

| <b>Mammary Parameters</b>                             | <b>Puberty<br/>(4-week)</b> | <b>Virgin adult<br/>(8-week)</b> | <b>Virgin<br/>adult<br/>(8-week)</b> | <b>Pregnancy<br/>(15.5 dpc)</b> |
|-------------------------------------------------------|-----------------------------|----------------------------------|--------------------------------------|---------------------------------|
| Tissue volume (TV)<br>(mm <sup>3</sup> )              | 23.50 $\pm$ 1.07            | 37.48 $\pm$ 1.76                 | 41.44 $\pm$ 2.53                     | 61.54 $\pm$ 1.60                |
| Ductal volume (DV)<br>(mm <sup>3</sup> )              | 0.44 $\pm$ 0.05             | 2.24 $\pm$ 0.17                  | 1.73 $\pm$ 0.22                      | 13.59 $\pm$ 0.68                |
| Percent ductal volume<br>(DV/TV%)                     | 1.63 $\pm$ 0.19             | 5.72 $\pm$ 0.45                  | 4.37 $\pm$ 0.37                      | 21.52 $\pm$ 1.72                |
| Ductal thickness (D.Th)<br>(mm)                       | 0.06 $\pm$ 0.004            | 0.06 $\pm$ 0.002                 | 0.07 $\pm$ 0.002                     | 0.08 $\pm$ 0.0009               |
| Ductal number (D.N)<br>(mm <sup>-1</sup> )            | 0.21 $\pm$ 0.03             | 0.85 $\pm$ 0.06                  | 0.64 $\pm$ 0.06                      | 2.36 $\pm$ 0.19                 |
| Ductal separation (D.Sp)<br>(mm)                      | 0.77 $\pm$ 0.04             | 0.40 $\pm$ 0.01                  | 0.43 $\pm$ 0.02                      | 0.23 $\pm$ 0.05                 |
| Ductal surface (DS)<br>(mm <sup>2</sup> )             | 27.21 $\pm$ 2.52            | 121 $\pm$ 10                     | 99.06 $\pm$ 7.81                     | 584 $\pm$ 33                    |
| Ductal surface density<br>(DS/TV) (mm <sup>-1</sup> ) | 1.19 $\pm$ 0.14             | 3.58 $\pm$ 0.27                  | 2.53 $\pm$ 0.22                      | 9.04 $\pm$ 0.91                 |
| Fractal dimension (FD)                                | 1.66 $\pm$ 0.03             | 2.13 $\pm$ 0.02                  | 2.04 $\pm$ 0.03                      | 2.51 $\pm$ 0.02                 |

**Supplementary Table 3.** Volumetric and morphometric parameters measured by PTA enhanced microCT in abdominal mammary glands from MPA-treated and control mice (n=6 mice/group). Data are shown as mean values  $\pm$  SEM.

| <b>Mammary Parameter</b>                           | <b>WT control</b> | <b>WT +MPA</b>    | <b>p-value</b> |
|----------------------------------------------------|-------------------|-------------------|----------------|
| Tissue volume (TV) (mm <sup>3</sup> )              | 42.26 $\pm$ 1.94  | 43.28 $\pm$ 2.23  | 0.735          |
| Ductal volume (DV)(mm <sup>3</sup> )               | 1.41 $\pm$ 0.21   | 2.34 $\pm$ 0.34   | 0.0430         |
| Percent ductal volume (DV/TV%)                     | 3.36 $\pm$ 0.54   | 5.43 $\pm$ 0.76   | 0.0506         |
| Ductal thickness (D.Th) (mm)                       | 0.065 $\pm$ 0.002 | 0.078 $\pm$ 0.004 | 0.0157         |
| Ductal number (D.N) (mm <sup>-1</sup> )            | 0.52 $\pm$ 0.08   | 0.68 $\pm$ 0.07   | 0.1505         |
| Ductal separation (D.Sp) (mm)                      | 0.54 $\pm$ 0.07   | 0.44 $\pm$ 0.01   | 0.1918         |
| Ductal surface (DS) (mm <sup>2</sup> )             | 108 $\pm$ 5       | 128 $\pm$ 13      | 0.1633         |
| Ductal surface density (DS/TV) (mm <sup>-1</sup> ) | 2.22 $\pm$ 0.35   | 2.98 $\pm$ 0.27   | 0.1146         |
| Fractal dimension (FD)                             | 2.11 $\pm$ 0.020  | 2.19 $\pm$ 0.026  | 0.0374         |

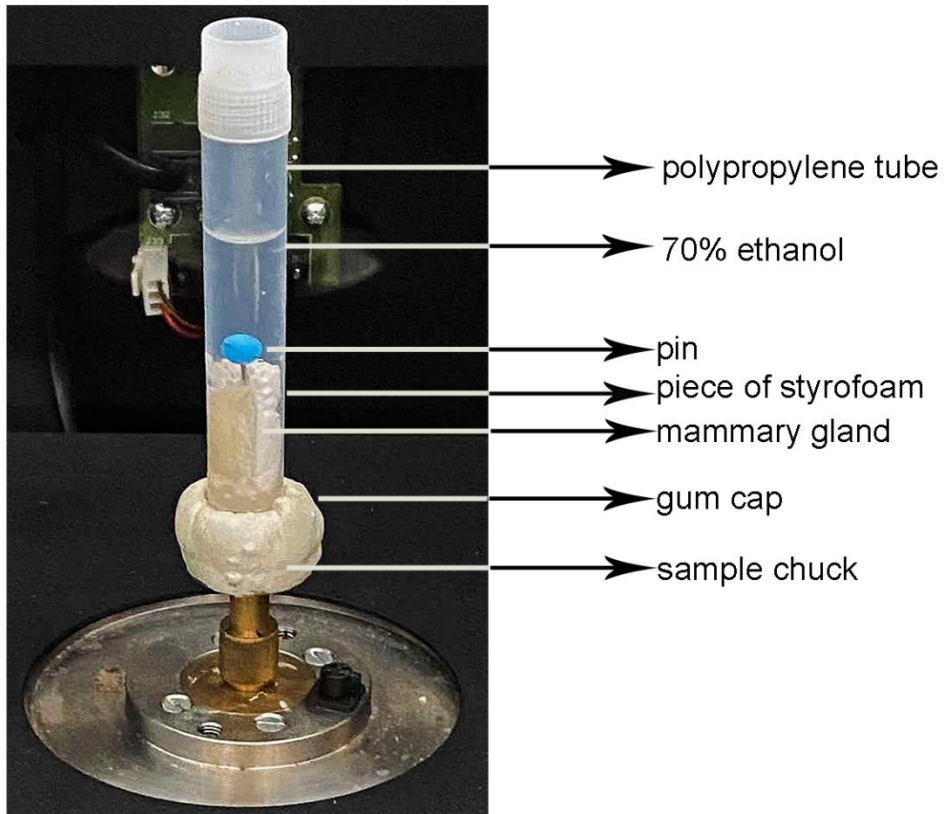

**Supplementary Figure 1. Sample mounting preparation of mammary gland for microCT scanning.** Mammary gland was stabilized in a piece of styrofoam with a pin and was placed into a microCT tube containing 70% alcohol. The tube was stuck with a gum cap in the microCT scanner chuck supplier.

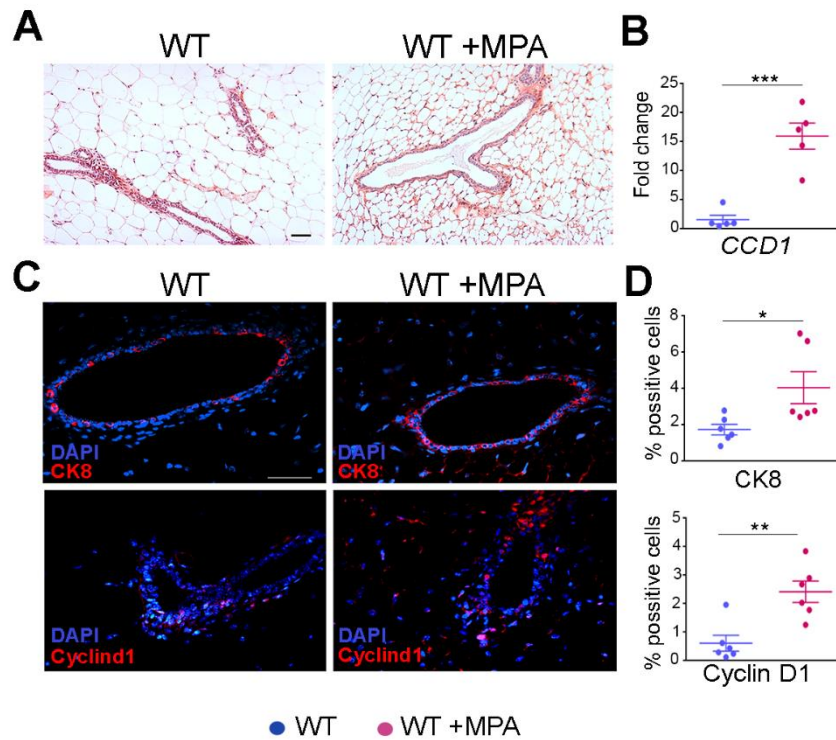

**Supplementary Figure 2. MPA induced expansion and proliferation of mammary gland epithelium.** (A) Representative images from H/E staining sections of mammary glands from MPA-treated and control mice (WT), Scale bar=15 $\mu$ m, magnification=200x. (B) qPCR expression analysis showed increased mRNA levels of Cyclin D1 (*CCD1*) in MPA-treated mice compared to control mice (WT) (n=5 per group). (C) Immunofluorescent staining of mammary epithelial cells with cytokeratin 8 (CK8) and Cyclin D1. (D) Quantification of the percentage of positive cells for CK8 and Cyclin D1 in immunofluorescent images through ImageJ. Scale bar= 15 $\mu$ m, magnification=400x. Data are shown as mean values  $\pm$  SEM. T-test was performed for statistical analysis (\* p<0.05, \*\* p<0.01).
